# Supplementary material for: Lycopene alleviates multiple-mycotoxin-induced toxicity by inhibiting mitochondrial damage and ferroptosis in the mouse jejunum
Source: Royal Society of Chemistry journal article supplement (doi:10.1039/d2fo02994d), 2022-01-01
Supplement: d2fo02994d3.pdf [file d2fo02994d3.pdf]

**Table S1. The sequences of oligonucleotide primers.**

| <b>Gene Name</b> | <b>NCBI accession NO.</b> | <b>Forward Primer(5'→3')</b><br><b>Reverse Primer(5'→3')</b> | <b>Product length (bp)</b> |
|------------------|---------------------------|--------------------------------------------------------------|----------------------------|
| <i>Actb</i>      | NM_007393.5               | GTGACGTTGACATCCGTAAAGA<br>GCCGGACTCATCGTACTCC                | 245                        |
| <i>Gapdh</i>     | NM_001289726.1            | CGTGCCGCCTGGAGAAACCTG<br>AGAGTGGGAGTTGCTGTTGAAGTCG           | 140                        |
| <i>Sirt1</i>     | NM_019812                 | TGATTGGCACCGATCCTCG<br>CCACAGCGTCATATCATCCAG                 | 86                         |
| <i>Tfam</i>      | NM_009360.4               | AACACCCAGATGCAAAACTTTCA<br>GACTTGGAGTTAGCTGCTCTTT            | 162                        |
| <i>Pgc1a</i>     | NM_008904.2               | ATACCGCAAAGAGCACGAGAA<br>CTCAAGAGCAGCGAAAGCGTCACA            | 253                        |
| <i>Nrf1</i>      | NM_001164226.1            | TATGGCGGAAGTAATGAAAGACG<br>CAACGTAAGCTCTGCCTTGTT             | 101                        |
| <i>Nrf2</i>      | NM_010902.4               | CTTTAGTCAGCGACAGAAGGAC<br>AGGCATCTTGTTTGGGAATGTG             | 227                        |
| <i>Mfn1</i>      | NM_024200.4               | CCTACTGCTCCTTCTAACCCA<br>AGGGACGCCAATCCTGTGA                 | 86                         |
| <i>Mfn2</i>      | NM_133201.3               | CTGGGGACCGGATCTTCTTC<br>CTGCCTCTCGAAATTCTGAAACT              | 143                        |
| <i>Opal</i>      | NM_133752.3               | TGAAAAATGGTTCGAGAGTCAG<br>CATTCCGTCTCTAGGTTAAAGCG            | 77                         |
| <i>Drp1</i>      | NM_152816.3               | ACCGGGAATGACCAAAGTACC<br>TGGGATTACTGATGAACCGAAGA             | 92                         |
| <i>Fis1</i>      | NM_025562.3               | AGAGCACGCAATTTGAATATGCC<br>ATAGTCCCCTGTTCCCTCTTT             | 125                        |
| <i>Acsl4</i>     | NM_001318509.2            | CTCACCATTATATTGCTGCCTGT<br>TCTCTTTGCCATAGCGTTTTTCT           | 114                        |
| <i>Ptgs2</i>     | NM_000963.4               | CACACTGCTGGTCATCAAGAT<br>TCACTCCTGTAATACTGGAGGC              | 126                        |
| <i>Fth1</i>      | NM_022500.4               | AGGGCGTAGGCCACTTCTT<br>CTGGGTTTTACCCCATTCATCTT               | 146                        |
| <i>Tfrc</i>      | NM_001128148.3            | GTTTCTGCCAGCCCCTTATTAT<br>GCAAGGAAAGGATATGCAGCA              | 152                        |
| <i>Slc7a11</i>   | NM_014331.4               | AGGGCATACTCCAGAACACG<br>GGACCAAAGACCTCCAGAAT<br>G            | 160                        |
| <i>Slc3a2</i>    | NM_001012662.3            | TGATGAATGCACCCTTGTACT<br>TG<br>GCTCCCCAGTGAAAGTGGA           | 183                        |
| <i>Gpx4</i>      | NM_001039847.3            | GCCTGGATAAGTACAGGGGTT<br>CATGCAGATCGACTAGCTGAG               | 99                         |
