# Supplementary figures and images for: Lycopene alleviates multiple-mycotoxin-induced toxicity by inhibiting mitochondrial damage and ferroptosis in the mouse jejunum
Source: Royal Society of Chemistry journal article supplement (doi:10.1039/d2fo02994d), 2022-01-01

## Mitochondrial Related Genes in Jejunum

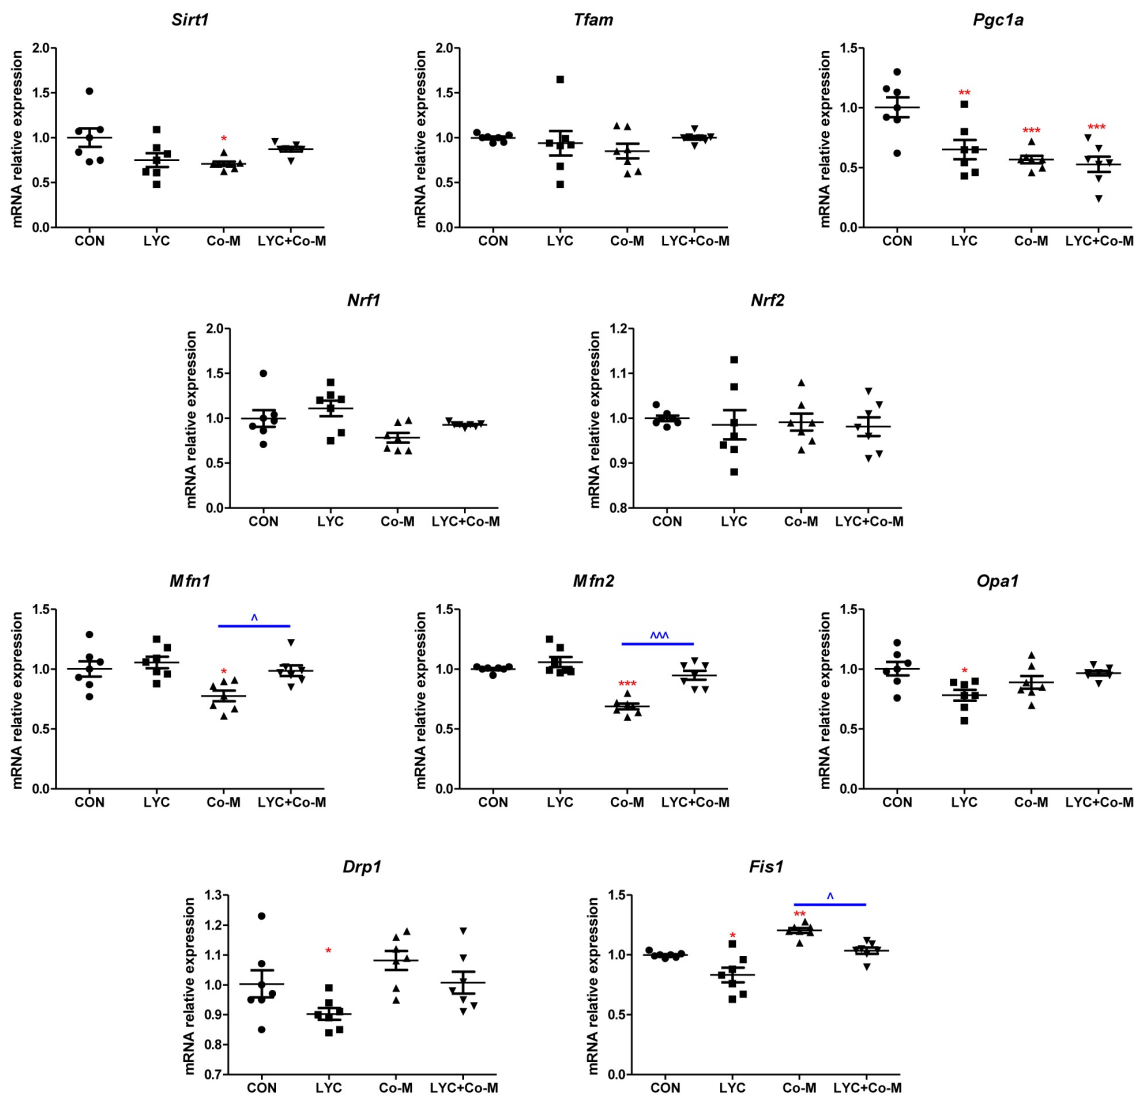

Supplement: d2fo02994d1.pdf [file d2fo02994d1.pdf]

## Ferroptosis Related Genes in Jejunum

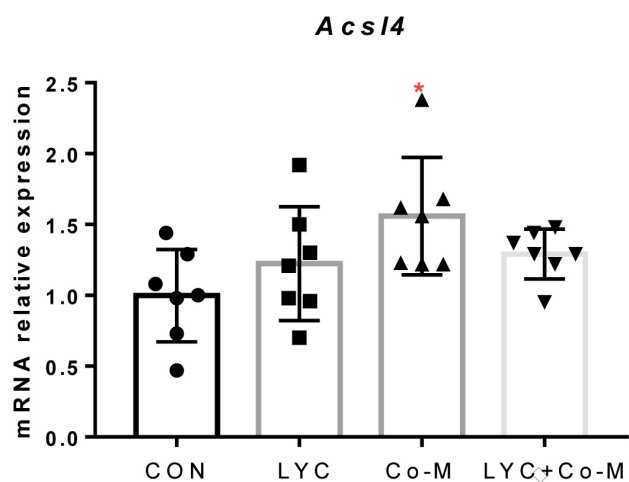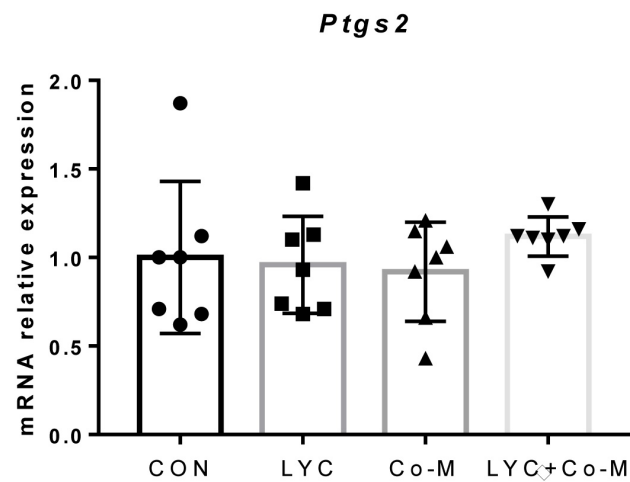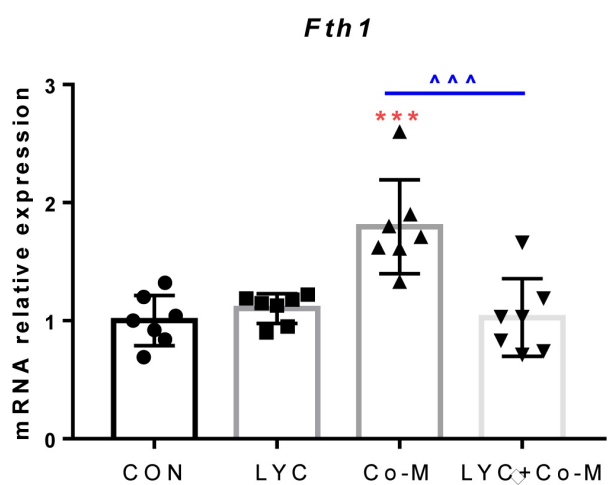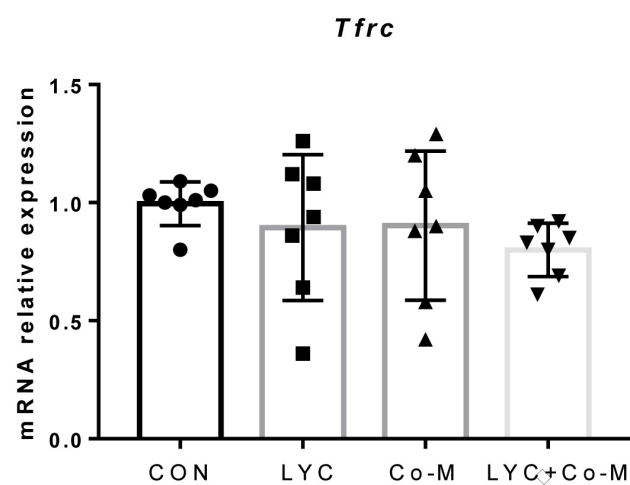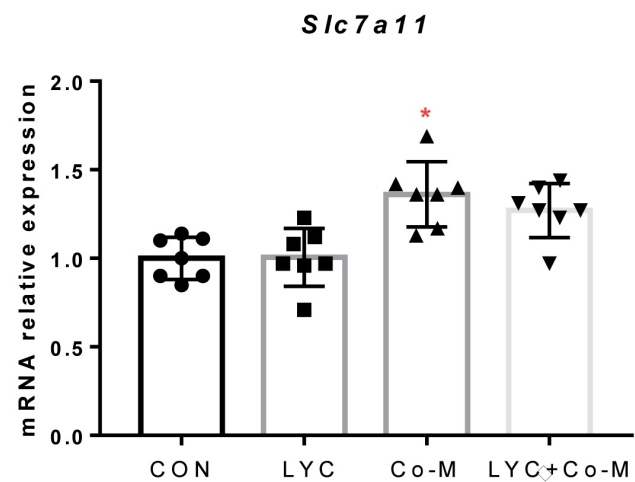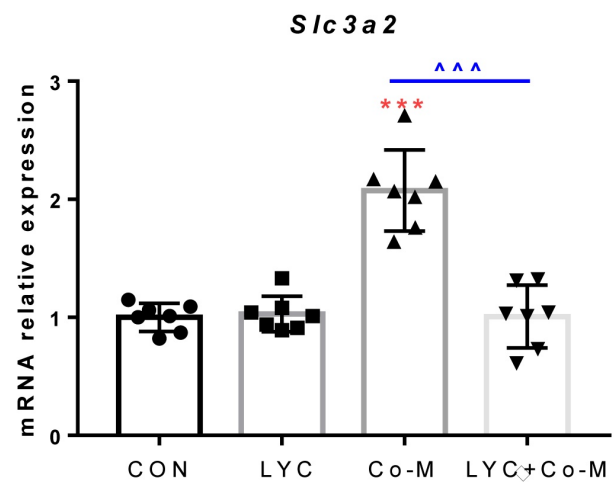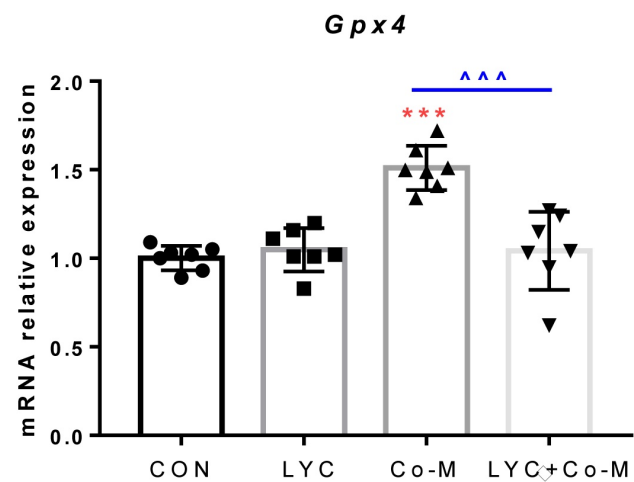

Supplement: d2fo02994d2.pdf [file d2fo02994d2.pdf]
